# Supplementary material for: Solvent effect on the excited-state proton transfer of 7-hydroxyquinoline along a hydrogen-bonded ethanol dimer
Source: Royal Society of Chemistry journal article supplement (doi:10.1039/c0cp02347g), 2011-01-01
Supplement: c0cp02347g.pdf [file c0cp02347g.pdf]

## Supporting Information

*for*

### **Solvent Effect on the Excited-State Proton Transfer of 7-Hydroxyquinoline along a Hydrogen-Bonded Ethanol Dimer**

*Baotao Kang,<sup>a</sup> Kyoung Chul Ko,<sup>a</sup> Sun-Young Park,<sup>b</sup> Du-Jeon Jang,<sup>\*,b</sup> and Jin Yong Lee<sup>\*,a</sup>*

<sup>a</sup>Department of Chemistry, Sungkyunkwan University, Suwon, 440-746, Korea

<sup>b</sup>Department of Chemistry, Seoul National University, Seoul 151-742, Korea.

E-mail: jinylee@skku.edu

## Contents

**Figure S1.** Ground state and excited state PES in gas phase

**Figure S2.** Ground state and excited state PES in n-heptane

**Figure S3.** Ground state and excited state PES in ethanol

**Figure S4.** Ground state and excited state PES in DMSO

**Figure S5.** TS and TS\* geometries in vacuum and three solvents

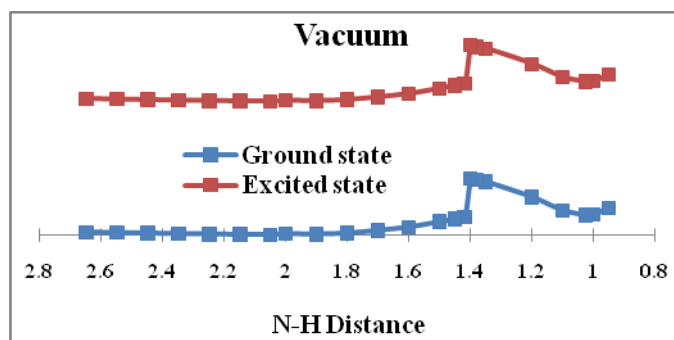

**Figure S1.** Ground state and excited state PES in gas phase.

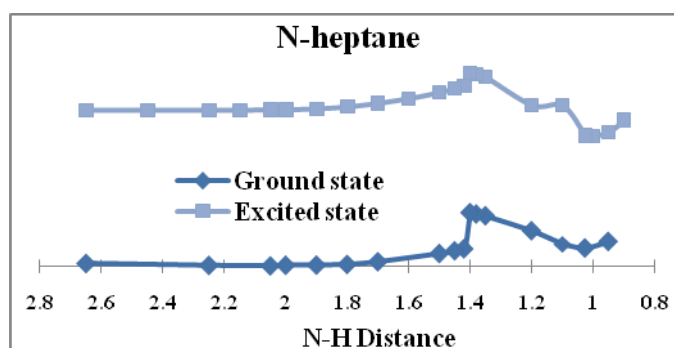

**Figure S2.** Ground state and excited state PES in n-heptane

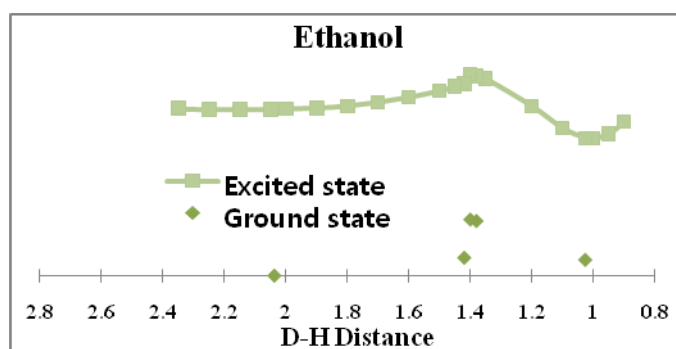

**Figure S3.** Ground state and excited state PES in ethanol.

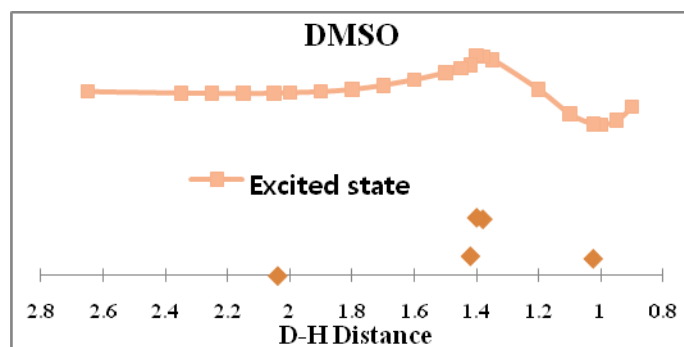

**Figure S4.** Ground state and excited state PES in DMSO

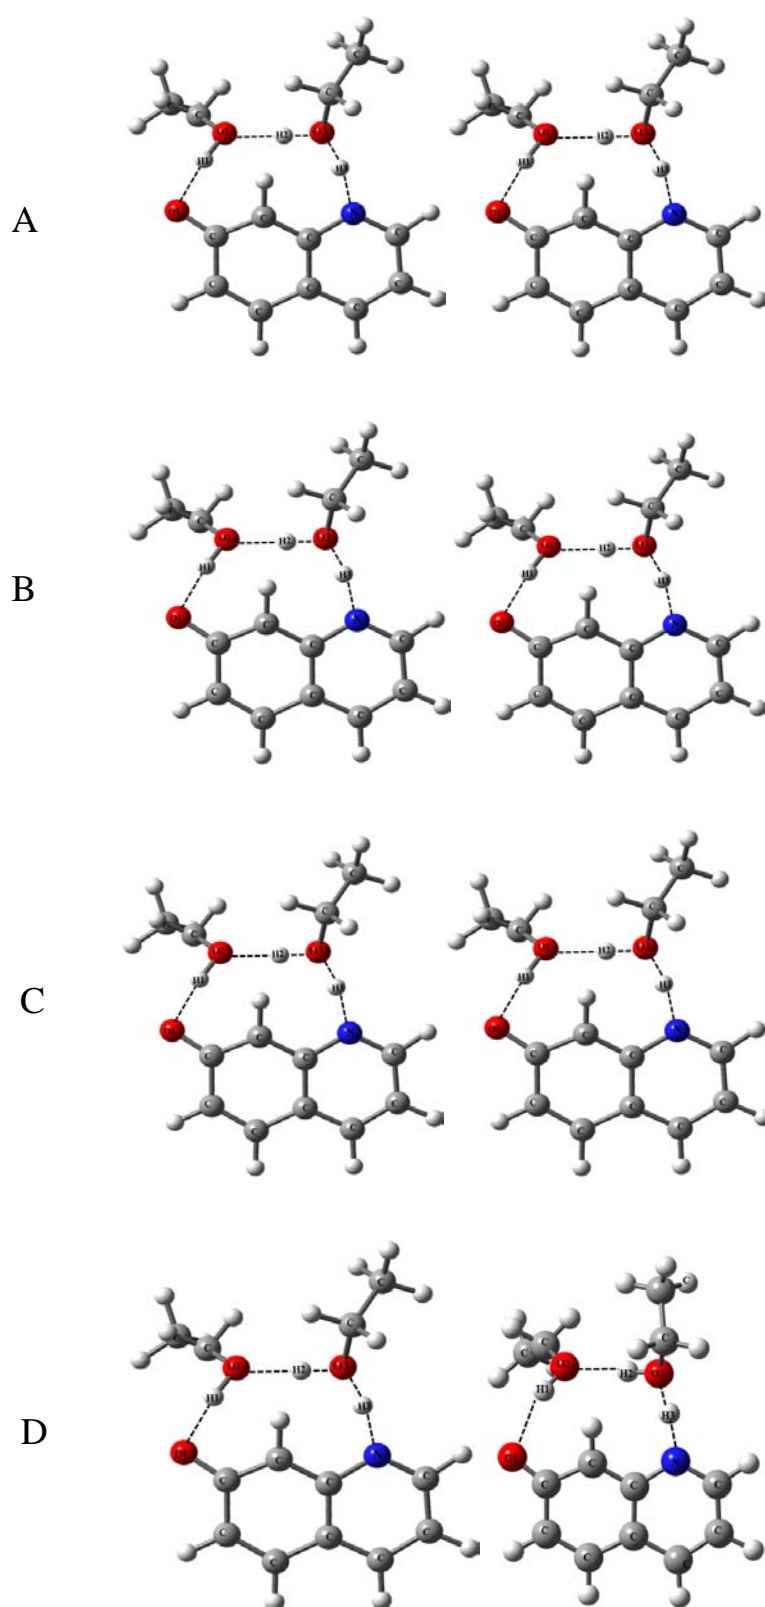

**Figure S5.** TS (left) and TS\* (right) geometries in vacuum (A), n-heptane (B), ethanol (C), and DMSO (D).
